# Supplementary material for: Cross-Cancer Genome-Wide Association Study of Endometrial Cancer and Epithelial Ovarian Cancer Identifies Genetic Risk Regions Associated with Risk of Both Cancers
Source: Oxford University Press journal article supplement (doi:10.1158/1055-9965.epi-20-0739), 2020-11-03
Supplement: 10559965epi200739-sup-243294_2_supp_6598754_qh54m0.xlsx [file 10559965epi200739-sup-243294_2_supp_6598754_qh54m0.xlsx]

## Sheet: ST3
Supplementary Table 3: Coordinates of GWAS-PW query and number of Credible Variants (CVs) at each of the associated regions
Abbreviations – CVs: credible variants; HG: high grade; LG: low grade
Region	GWAS-PW start (bp)	GWAS-PW end (bp)	Phenotype ECAC	Phenotype OCAC	LeadSNP	P-value	Number CVs
8q24.21	128659463	130380799	Endometrioid	All	rs10103314	1.49136e-20	70
17q12	34470079	36809149	All	Clear cell	rs11263763	2.46223e-24	3
17q12	34470079	36809149	Endometrioid	Clear cell	rs11263763	2.20499e-19	4
17q21.32	45876022	47516523	All	Clear cell	rs882380	1.90707e-09	45
17q21.32	45876022	47516523	Endometrioid	Clear cell	rs882380	4.67115e-09	45
17q21.32	45876022	47516523	All	Endometrioid	rs882380	2.89558e-10	73
17q21.32	45876022	47516523	Endometrioid	Endometrioid	rs882380	6.91319e-10	73
17q21.32	45876022	47516523	All	Serous borderline	rs12950225	1.26e-08	69
17q21.32	45876022	47516523	Endometrioid	Serous borderline	rs882380	2.88483e-11	65
17q21.32	45876022	47516523	All	Serous LG & borderline	rs882380	3.101e-12	65
17q21.32	45876022	47516523	All	Serous LG	rs882380	1.83851e-09	69
2p16.1	60292120	62428117	All	Clear cell	rs148261157	1.85196e-09	15
2p16.1	60292120	62428117	Endometrioid	Clear cell	rs7579014	2.92144e-08	14
5p15.33	1042645	1979754	All	All	rs7725218	2.70906e-14	4
5p15.33	1042645	1979754	Endometrioid	All	rs7726159	5.22946e-14	4
5p15.33	1042645	1979754	All	Serous	rs6897196	2.21195e-13	6
5p15.33	1042645	1979754	Endometrioid	Serous	rs7725218	1.395e-15	3
5p15.33	1042645	1979754	All	Serous HG	rs7725218	1.06708e-14	2
5p15.33	1042645	1979754	Endometrioid	Serous HG	rs7725218	2.34181e-14	3
5p15.33	1042645	1979754	All	Serous LG & borderline	rs2853672	1.02527e-08	1
5p15.33	1042645	1979754	Endometrioid	Serous LG & borderline	rs2853672	7.20498e-09	3
9q34.2	135298917	137040737	All	All	rs635634	3.45669e-10	51
9q34.2	135298917	137040737	All	Serous	rs687289	4.14755e-11	52
10p12.32	19716878	22772115	All	All	rs564819152	8.73227e-11	26
10p12.32	19716878	22772115	All	Serous	rs7090708	3.62192e-09	50
10p12.32	19716878	22772115	All	Serous HG	rs7090708	7.62685e-09	65
7q22.1	98716494	100196525	All	Serous borderline	rs139380031	1.28e-07	10
7p22.1	2772261	4573169	All	All	rs13221982	1.57032e-07	49
9p12	9166788	10879198	Endometrioid	Serous LG & borderline	rs2475339	4.35633e-08	29
11q13.3	68006171	69516025	Endometrioid	All	rs7118966	1.24752e-07	12
