# Supplementary material for: Cross-Cancer Genome-Wide Association Study of Endometrial Cancer and Epithelial Ovarian Cancer Identifies Genetic Risk Regions Associated with Risk of Both Cancers
Source: Oxford University Press journal article supplement (doi:10.1158/1055-9965.epi-20-0739), 2020-11-03
Supplement: 10559965epi200739-sup-243294_2_supp_6598755_qh54vb.xlsx [file 10559965epi200739-sup-243294_2_supp_6598755_qh54vb.xlsx]

## Sheet: ST2
Supplementary Table 2: Evidence for genes targeted by joint ovarian and endometrial cancer credible variants (CVs)
Abbreviations: ECAC - Endometrial Cancer Association Consortium; OCAC - Ovarian Cancer Association Consortium; TCGA - The Cancer Genome Atlas; GTEx - Genotype-Tissue Expression; eQTL - expression Quantitative Trait Locus; UCEC - Uterine Corpus Endometrial Cancer Tissue; OV - Ovarian Cancer Tissue
Region	Phenotype ECAC	Phenotype OCAC	TCGA eQTL (UCEC or OV)	GTEx eQTL (Uterus or Ovary)	Blood eQTL	Promoter CVs	Promoter loops common to both E6E7hTERT endometrium and IOSE11 ovarian cell lines	E6E7hTERT endometrium promoter loops	IOSE11 ovarian promoter loops
8q24.21	endometrioid	all	nil	nil	nil	nil	MYC	MYC	CCAT1, MYC, PVT1, MIR1205, MIR1207, MIR1208, MIR3686
17q12	all	clear cell	nil	nil	nil	HNF1B	nil	nil	DHRS11, HNF1B
17q12	endometrioid	clear cell	nil	nil	nil	HNF1B	nil	nil	DHRS11, HNF1B
17q21.32	all	clear cell	nil	nil	SNX11|rs882380|-39.84|T|3.27E-310; HOXB2|rs882380|44.13|C|3.27E-310	MIR1203	nil	nil	EFCAB13, LRRC46, MRPL10, SCRN2, SP6, SP2, PNPO, ENSG00000234494, PRR15L, CDK5RAP3, COPZ2, MIR152, NFE2L1, HOXB2, HOXB-AS1, HOXB3, HOXB4, MIR10A, HOXB-AS3, HOXB6, HOXB7, HOXB8, HOXB9, MIR196A1, UBE2Z, CALCOCO2, ATP5G1, TTLL6, ENSG00000246640, ITGA3, SAMD14, PPP1R9B, HOXB13, PRAC2, MIR3185, GIP
17q21.32	endometrioid	clear cell	nil	nil	SNX11|rs882380|-39.84|T|3.27E-310; HOXB2|rs882380|44.13|C|3.27E-310	MIR1203	nil	nil	EFCAB13, LRRC46, MRPL10, SCRN2, SP6, SP2, PNPO, ENSG00000234494, PRR15L, CDK5RAP3, COPZ2, MIR152, NFE2L1, HOXB2, HOXB-AS1, HOXB3, HOXB4, MIR10A, HOXB-AS3, HOXB6, HOXB7, HOXB8, HOXB9, MIR196A1, UBE2Z, CALCOCO2, ATP5G1, TTLL6, ENSG00000246640, ITGA3, SAMD14, PPP1R9B, HOXB13, PRAC2, MIR3185, GIP
17q21.32	all	endometrioid	nil	nil	SNX11|rs882380|-39.84|T|3.27E-310; HOXB2|rs882380|44.13|C|3.27E-310	SNX11, MIR1203	SNX11, CBX1, HOXB8	SNX11, CBX1, HOXB8	EFCAB13, SNX11, LRRC46, MRPL10, SCRN2, SP6, SP2, PNPO, ENSG00000234494, PRR15L, CDK5RAP3, COPZ2, MIR152, NFE2L1, CBX1, HOXB2, HOXB-AS1, HOXB3, HOXB4, MIR10A, HOXB-AS3, HOXB6, HOXB7, HOXB8, HOXB9, MIR196A1, MIR1203, UBE2Z, CALCOCO2, ATP5G1, TTLL6, ENSG00000246640, ITGA3, SAMD14, PPP1R9B, HOXB13, PRAC2, MIR3185, GIP
17q21.32	endometrioid	endometrioid	nil	nil	SNX11|rs882380|-39.84|T|3.27E-310; HOXB2|rs882380|44.13|C|3.27E-310	SNX11, MIR1203	SNX11, CBX1, HOXB8	SNX11, CBX1, HOXB8	EFCAB13, SNX11, LRRC46, MRPL10, SCRN2, SP6, SP2, PNPO, ENSG00000234494, PRR15L, CDK5RAP3, COPZ2, MIR152, NFE2L1, CBX1, HOXB2, HOXB-AS1, HOXB3, HOXB4, MIR10A, HOXB-AS3, HOXB6, HOXB7, HOXB8, HOXB9, MIR196A1, MIR1203, UBE2Z, CALCOCO2, ATP5G1, TTLL6, ENSG00000246640, ITGA3, SAMD14, PPP1R9B, HOXB13, PRAC2, MIR3185, GIP
17q21.32	all	serous borderline	nil	nil	SNX11|rs882380|-39.84|T|3.27E-310; HOXB2|rs882380|44.13|C|3.27E-310	MIR1203	nil	nil	EFCAB13, LRRC46, MRPL10, SCRN2, SP6, SP2, PNPO, ENSG00000234494, PRR15L, CDK5RAP3, COPZ2, MIR152, NFE2L1, SNX11, HOXB2, HOXB-AS1, HOXB7, HOXB8, HOXB9, HOXB4, MIR10A, HOXB-AS3, HOXB3, HOXB6,MIR1203, MIR196A1, UBE2Z, CALCOCO2, ATP5G1, TTLL6, ENSG00000246640, ITGA3, SAMD14, PPP1R9B, HOXB13, PRAC2, MIR3185, GIP
17q21.32	endometrioid	serous borderline	nil	nil	SNX11|rs882380|-39.84|T|3.27E-310; HOXB2|rs882380|44.13|C|3.27E-310	MIR1203	nil	nil	EFCAB13, LRRC46, MRPL10, SCRN2, SP6, SP2, PNPO, ENSG00000234494, PRR15L, CDK5RAP3, COPZ2, MIR152, NFE2L1, SNX11, HOXB2, HOXB-AS1, HOXB7, HOXB8, HOXB3, HOXB6, HOXB9, MIR1203, MIR196A1, UBE2Z, CALCOCO2, ATP5G1, TTLL6, ENSG00000246640, ITGA3, SAMD14, PPP1R9B, HOXB13, PRAC2, MIR3185, GIP
17q21.32	all	serous LG & borderline	nil	nil	SNX11|rs882380|-39.84|T|3.27E-310; HOXB2|rs882380|44.13|C|3.27E-310	MIR1203	nil	nil	EFCAB13, LRRC46, MRPL10, SCRN2, SP6, SP2, PNPO, ENSG00000234494, PRR15L, CDK5RAP3, COPZ2, MIR152, NFE2L1, SNX11, HOXB2, HOXB-AS1, HOXB4, MIR10A, HOXB-AS3, HOXB7, HOXB8, HOXB3, HOXB6, HOXB9, MIR1203, MIR196A1, UBE2Z, CALCOCO2, ATP5G1, TTLL6, ENSG00000246640, ITGA3, SAMD14, PPP1R9B, HOXB13, PRAC2, MIR3185, GIP
17q21.32	all	serous LG	nil	nil	SNX11|rs882380|-39.84|T|3.27E-310; HOXB2|rs882380|44.13|C|3.27E-310	SNX11, MIR1203	SNX11, CBX1, HOXB8	SNX11, CBX1, HOXB8	EFCAB13, SNX11, LRRC46, MRPL10, SCRN2, SP6, SP2, PNPO, ENSG00000234494, PRR15L, CDK5RAP3, COPZ2, MIR152, NFE2L1, CBX1, HOXB2, HOXB-AS1, HOXB3, HOXB4, MIR10A, HOXB-AS3, HOXB6, HOXB7, HOXB8, HOXB9, MIR1203, MIR196A1, UBE2Z, CALCOCO2, ATP5G1, TTLL6, ENSG00000246640, ITGA3, SAMD14, PPP1R9B, HOXB13, PRAC2, MIR3185, GIP
2p16.1	all	clear cell	BCL11A|rs7579014|0.31|G|2.59E-05	nil	nil	nil	nil	nil	nil
2p16.1	endometrioid	clear cell	BCL11A|rs7579014|0.31|G|2.59E-05	nil	nil	nil	nil	nil	nil
5p15.33	all	all	nil	nil	nil	nil	nil	SLC6A19	nil
5p15.33	endometrioid	all	nil	nil	nil	nil	nil	SLC6A19	nil
5p15.33	all	serous	nil	nil	nil	nil	nil	SLC6A19	nil
5p15.33	endometrioid	serous	nil	nil	nil	nil	nil	SLC6A19	nil
5p15.33	all	serous HG	nil	nil	nil	nil	nil	SLC6A19	nil
5p15.33	endometrioid	serous HG	nil	nil	nil	nil	nil	SLC6A19	nil
5p15.33	all	serous LG & borderline	nil	nil	nil	TERT	nil	nil	nil
5p15.33	endometrioid	serous LG & borderline	nil	nil	nil	TERT	nil	nil	nil
9q34.2	all	all	ABO|rs657152|0.51|A|3.37E-14	ABO|rs657152|0.50|A|8.12E-14	ABO|rs9411378|-38.31|A|3.27E-310	CACFD1	nil	nil	nil
9q34.2	all	serous	ABO|rs657152|0.51|A|3.37E-14	ABO|rs657152|0.50|A|8.12E-14	ABO|rs9411378|-38.31|A|3.27E-310	CACFD1	nil	nil	CACFD1, RALGDS
10p12.31	all	all	nil	nil	nil	MLLT10	MLLT10	MLLT10	NEBL, MLLT10, SKIDA1, MSRB2, PIP4K2A, COMMD3-BMI1, BMI1, SPAG6, DNAJC1, COMMD3
10p12.31	all	serous	nil	nil	nil	CASC10, MIR1915	CASC10, MIR1915, SKIDA1, MLLT10	CASC10, MIR1915, SKIDA1, MLLT10	NEBL, CASC10, MIR1915, DNAJC1, SKIDA1, SPAG6, OTUD1, MLLT10, COMMD3-BMI1, COMMD3, PIP4K2A, BMI1, MSRB2
10p12.31	all	serous HG	nil	nil	nil	CASC10, MIR1915	CASC10, MIR1915, SKIDA1, MLLT10	CASC10, MIR1915, SKIDA1, MLLT10	NEBL, CASC10, MIR1915, DNAJC1, SKIDA1, SPAG6, OTUD1, MLLT10, COMMD3-BMI1, COMMD3, PIP4K2A, BMI1, MSRB2
7p22.2	all	all	nil	nil	nil	nil	COX19, GPER1, ZFAND2A, ENSG00000229043	COX19, GPR146, GPER1, ZFAND2A, ELFN1, ENSG00000229043	CYP2W1, PDGFA, ENSG00000223855, PRKAR1B, HEATR2, COX19, GPER1, ZFAND2A, ENSG00000229043, MICALL2, INTS1, MAFK, TMEM184A, EIF3B
9p12	endometrioid	serous LG & borderline	nil	nil	nil	nil	nil	nil	nil
7q22.1	all	serous borderline	nil	nil	nil	CYP3A43	nil	nil	BRI3, ENSG00000242687, SMURF1, KPNA7, MYH16, ARPC1A, FAM200A, ZNF655, COPS6, MCM7, AP4M1, ZKSCAN5, ZNF394, CYP3A43, ZSCAN25, C7orf43, MIR4658, LRCH4, FBXO24
11q13.3	endometrioid	all	nil	nil	nil	nil	CCND1, MYEOV	MIR3164, CCND1, MYEOV	CPT1A, MYEOV, CCND1, ORAOV1, FGF19
