# Supplementary material for: Cross-Cancer Genome-Wide Association Study of Endometrial Cancer and Epithelial Ovarian Cancer Identifies Genetic Risk Regions Associated with Risk of Both Cancers
Source: Oxford University Press journal article supplement (doi:10.1158/1055-9965.epi-20-0739), 2020-11-03
Supplement: 10559965epi200739-sup-243294_2_supp_6598756_qh54m0.xlsx [file 10559965epi200739-sup-243294_2_supp_6598756_qh54m0.xlsx]

## Sheet: ST1
Supplementary Table 1: Counts of variants included in GWAS meta-analysis
Abbreviations – Phet: heterogeneity p-value; HG: high grade; LG: low grade
Endometrial Cancer Phenotype	Ovarian Cancer Phenotype	No. Variants with concordant direction of effect	No. variants not heterogenous (Phet >0.05)	No. variants nominally significant (P<0.05 for both)
All	All	5210157	5181262	24187
All	Serous	5170372	5151831	22869
All	Serous borderline	5075102	4991689	18148
All	Serous HG	5145961	5122100	22168
All	Serous LG & borderline	5136498	5075181	19873
All	Serous LG	5136268	5014517	16499
All	Endometrioid	5129002	5068790	22394
All	Clear cell	5096430	4993037	18911
All	Mucinous	5108306	5039173	20381
Endometrioid	All	5160403	5120211	23685
Endometrioid	Serous	5130676	5103871	22547
Endometrioid	Serous borderline	5078079	5014351	18202
Endometrioid	Serous HG	5114500	5088550	21960
Endometrioid	Serous LG & borderline	5115932	5073115	19226
Endometrioid	Serous LG	5092550	4994891	15508
Endometrioid	Endometrioid	5102491	5059200	20071
Endometrioid	Clear cell	5069105	4988703	18560
Endometrioid	Mucinous	5075962	5028256	18949
Total variants analysed				364138
